# Supplementary material for: Microglia PKM2 Mediates Neuroinflammation and Neuron Loss in Mice Epilepsy through the Astrocyte C3-Neuron C3R Signaling Pathway
Source: MDPI journal article supplement (doi:10.3390/brainsci13020262), 2023-02-03
Supplement: s1 [file s1]

## Supplementary Figure S1

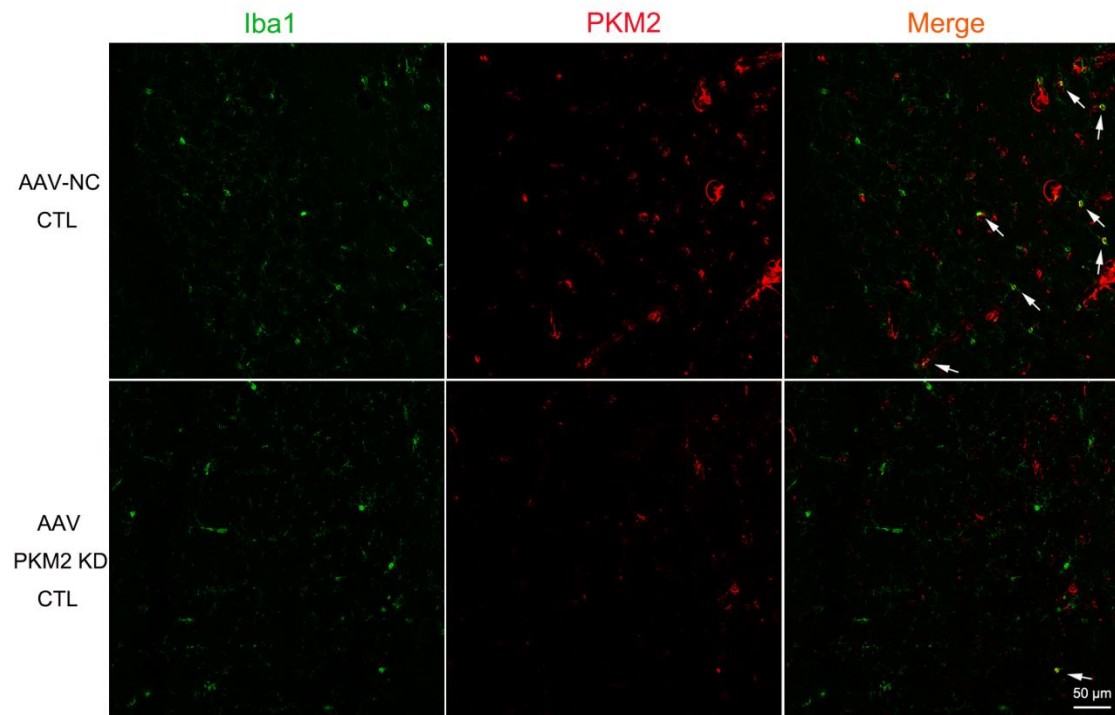

**Figure S1.** The knockdown efficiency of AAV-F4/80-PKM2 KD in the mice hippocampus. (a) Representative TSA staining images of PKM2 in Iba1-positive microglia in the hippocampus of CTL mice stereotactically injected with AAV-F4/80-NC or AAV-F4/80-PKM2 KD. Scale bar, 50  $\mu$ m. N=3 mice per group.

## Supplementary Figure S2

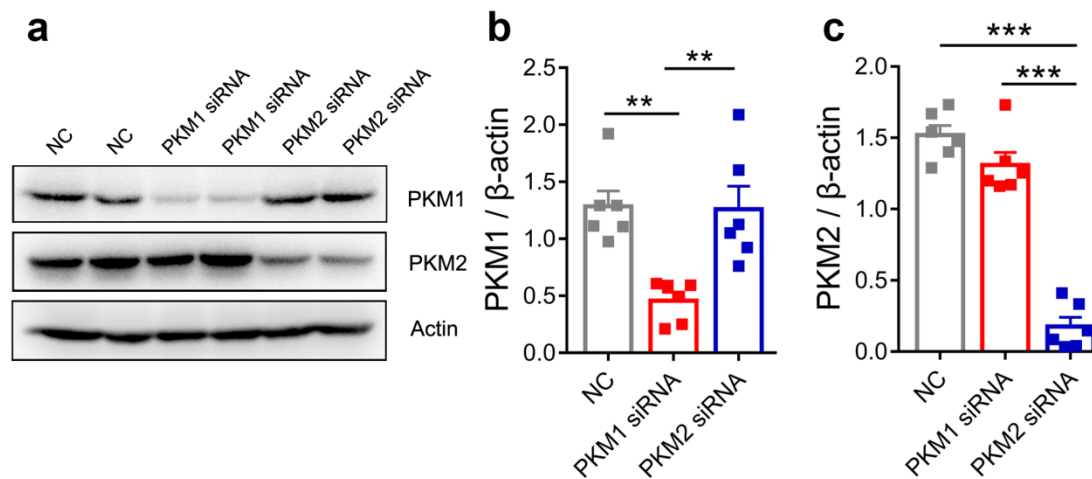

**Figure S2.** The knockdown efficiency of PKM2 siRNA in primary microglia. **(a)** Representative immunoblotting images of PKM1 and PKM2 in primary microglia transfected with NC siRNA, PKM1 siRNA or PKM2 siRNA. **(b)** Quantification of PKM1 protein expression in primary microglia transfected with NC siRNA, PKM1 siRNA or PKM2 siRNA. \*\*  $p = 0.0033$ , compared to the NC group; \*\*  $p = 0.0042$ , compared to the PKM1 siRNA group. **(c)** Quantification of PKM2 protein expression in primary microglia transfected with NC siRNA, PKM1 siRNA or PKM2 siRNA. \*\*\*  $p < 0.0001$ , compared to the NC group; \*\*\*  $p < 0.0001$ , compared to the PKM1 siRNA group. For six independent experiments. Data are presented as mean  $\pm$  SEM.

### Supplementary Figure S3

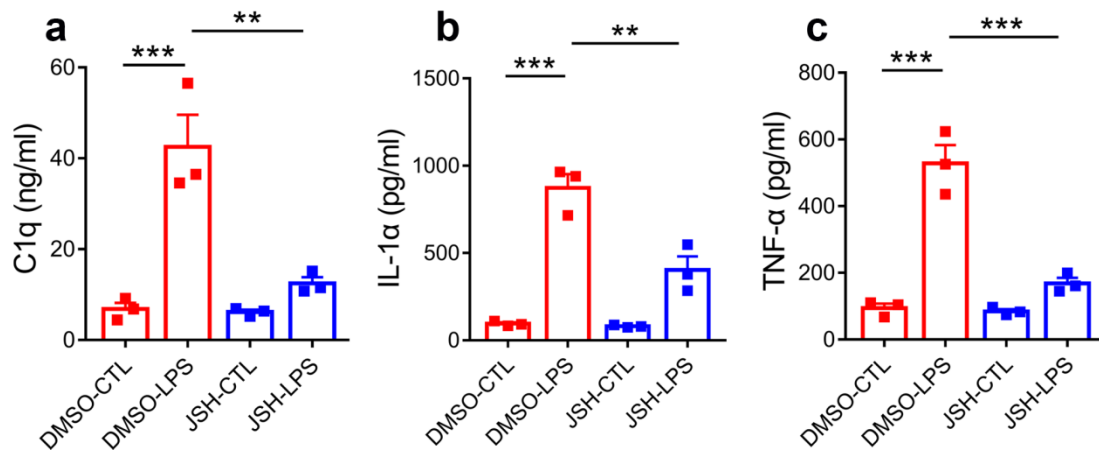

**Figure S3.** NF-κB inhibition attenuates LPS-induced C1q, TNF-α and IL-1α secretion in microglia. Quantitative of supernatant C1q (**a**, \*\*\*  $p = 0.0006$ , compared to the DMSO-CTL group; \*\*  $p = 0.0018$ , compared to the DMSO-LPS group), IL-1α (**b**, \*\*\*  $p < 0.0001$ , compared to the DMSO-CTL group; \*\*  $p = 0.0015$ , compared to the DMSO-LPS group) and TNF-α (**c**, \*\*\*  $p < 0.0001$ , compared to the DMSO-CTL group; \*\*\*  $p = 0.0001$ , compared to the DMSO-LPS group) concentration in DMSO or JSH pretreated primary microglia accompany with or without LPS. For three independent experiments. Data are presented as mean  $\pm$  SEM.

# Supplementary Figure S4

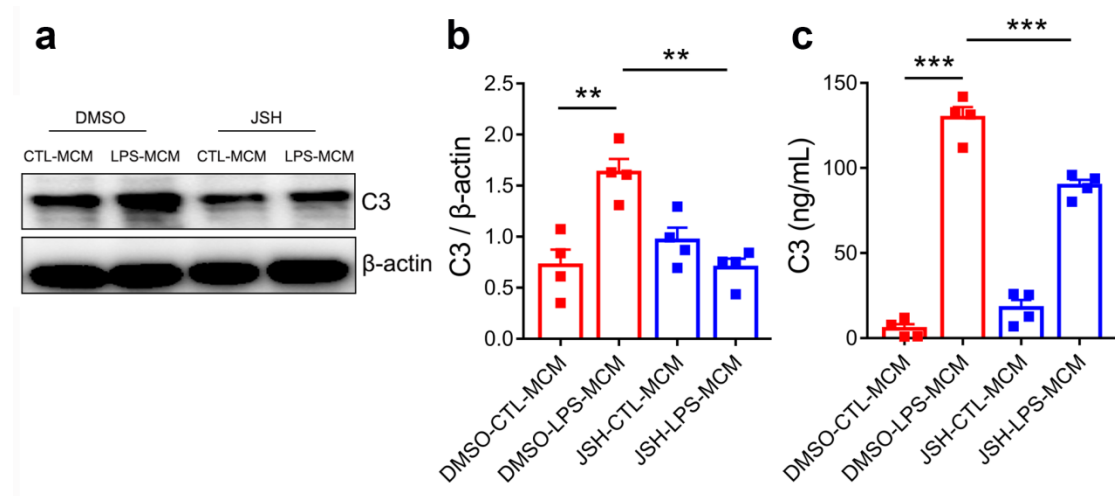

**Figure S4.** Microglia NF-κB inhibition reduces astrocyte C3 expression. Representative immunoblotting images (**a**) and quantification of C3 protein (**b**, \*\*p=0.0015, compared to the DMSO-CTL-MCM group; \*\*p=0.0012, compared to the DMSO-LPS-MCM group) in astrocyte treated with MCM of primary microglia pretreated with JSH or DMSO followed by PBS or LPS treatment groups. For four independent experiments. (**c**) ELISA measurement of astrocyte supernatant C3 concentration in astrocyte treated with MCM of primary microglia pretreated with JSH or DMSO followed by PBS or LPS treatment groups; \*\*\*p<0.0001, compared to the DMSO-CTL-MCM group; \*\*\*p=0.0002, compared to the DMSO-LPS-MCM group. For four independent experiments. Data are presented as mean ± SEM.
